# Supplementary material for: Repair of UVB-induced DNA damage is reduced in melanoma due to low XPC and global genome repair
Source: PubMed Central journal article supplement (PMC5308628; doi:10.18632/oncotarget.10902), 2016-07-28
Supplement: oncotarget-07-60940-s001.pdf [file oncotarget-07-60940-s001.pdf]

## Repair of UVB-induced DNA damage is reduced in melanoma due to low XPC and global genome repair

### Supplementary Material

**Supplementary Table 1. Clinical parameters**

| Clinical Parameter                      | Total Patient No. (%) |
|-----------------------------------------|-----------------------|
| <b>Total</b>                            | 157 (100)             |
| <b>Sex</b>                              |                       |
| Female                                  | 48 (30.6)             |
| Male                                    | 109 (69.4)            |
| <b>Age at 1st Diagnosis</b>             |                       |
| Mean (range)                            | 65.8 (23.3 - 94.5)    |
| Unknown                                 | 15 (9.6)              |
| <b>Survival (weeks)</b>                 |                       |
| Mean (range)                            | 206.6 (3.1 - 1418)    |
| Alive                                   | 17 (10.8)             |
| <b>Breslow Thickness</b>                |                       |
| Mean (range)                            | 5.3 (0.4 - 33)        |
| No. Unknown                             | 62 (39.5)             |
| <b>Solar Elastosis</b>                  |                       |
| None                                    | 8 (5.1)               |
| Mild                                    | 25 (15.9)             |
| Moderate                                | 17 (10.8)             |
| Severe                                  | 42 (26.8)             |
| Unknown                                 | 65 (41.4)             |
| <b>Clark's Level (Stage)</b>            |                       |
| 1                                       | 16 (10.2)             |
| 2                                       | 47 (29.9)             |
| 3                                       | 47 (29.9)             |
| 4                                       | 21 (13.4)             |
| No. Unknown                             | 26 (16.6)             |
| <b>Weeks Local to Distal Metastasis</b> |                       |
| Mean (range)                            | 121 (5.6 - 343.4)     |
| No. Unknown                             | 66 (42)               |

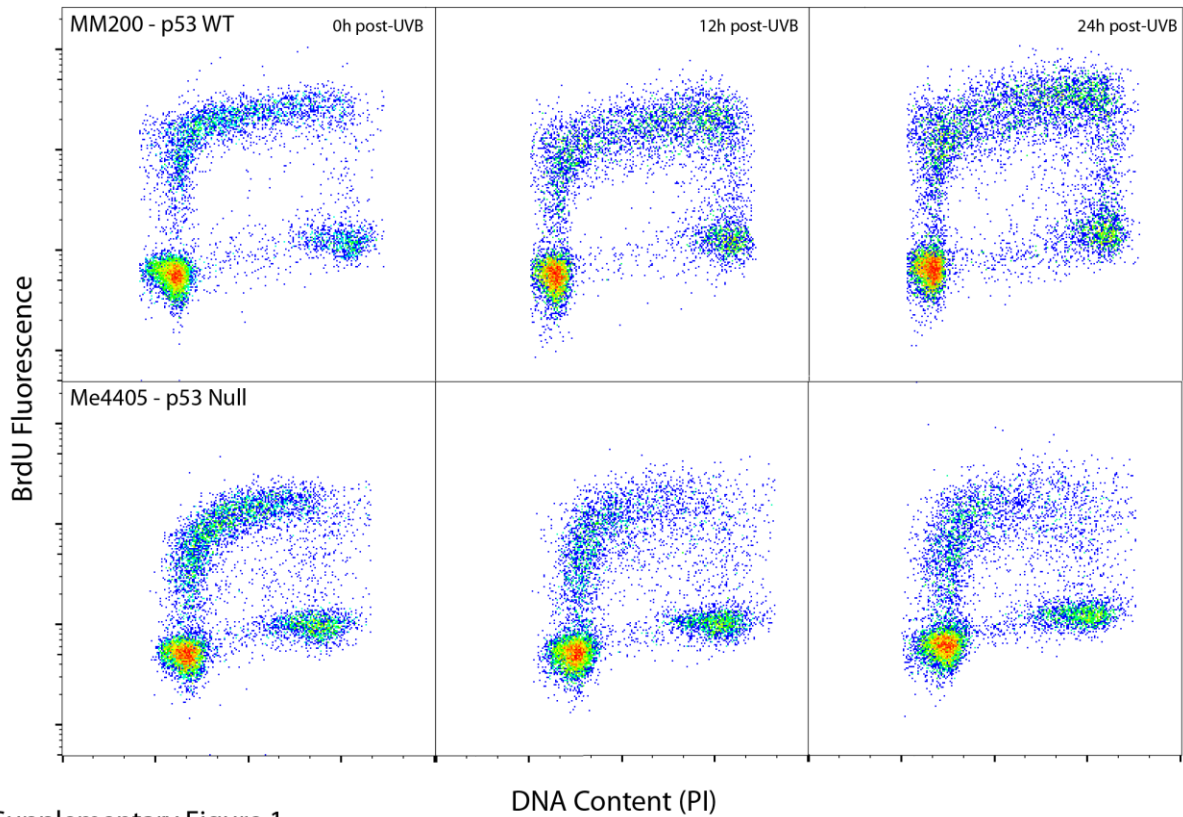

Supplementary Figure 1

**Supplementary Figure S1. Cell cycle of melanoma cell lines after 650J/m<sup>2</sup> UVB:** The cell cycle of p53 WT melanoma cell line MM200 and p53 null cell line Me4405 were analysed after 650J/m<sup>2</sup> UVB using BrdU and PI. Cells were treated with BrdU before UVB treatment and cells in each phase of the cell cycle were examined prior to and then 12 and 24 hours post UVB.
